# Supplementary material for: GATA-6 promotes cell survival by up-regulating BMP-2 expression during embryonic stem cell differentiation
Source: PubMed Central journal article supplement — Mol Biol Cell. 2012 Sep 15;23(18):3754–63. doi: 10.1091/mbc.E12-04-0313 (PMC3442421; doi:10.1091/mbc.e12-04-0313), 2012-09-15
Supplement: supp_E12-04-0313_CombinedSupMats.pdf [file supp_E12-04-0313_CombinedSupMats.pdf]

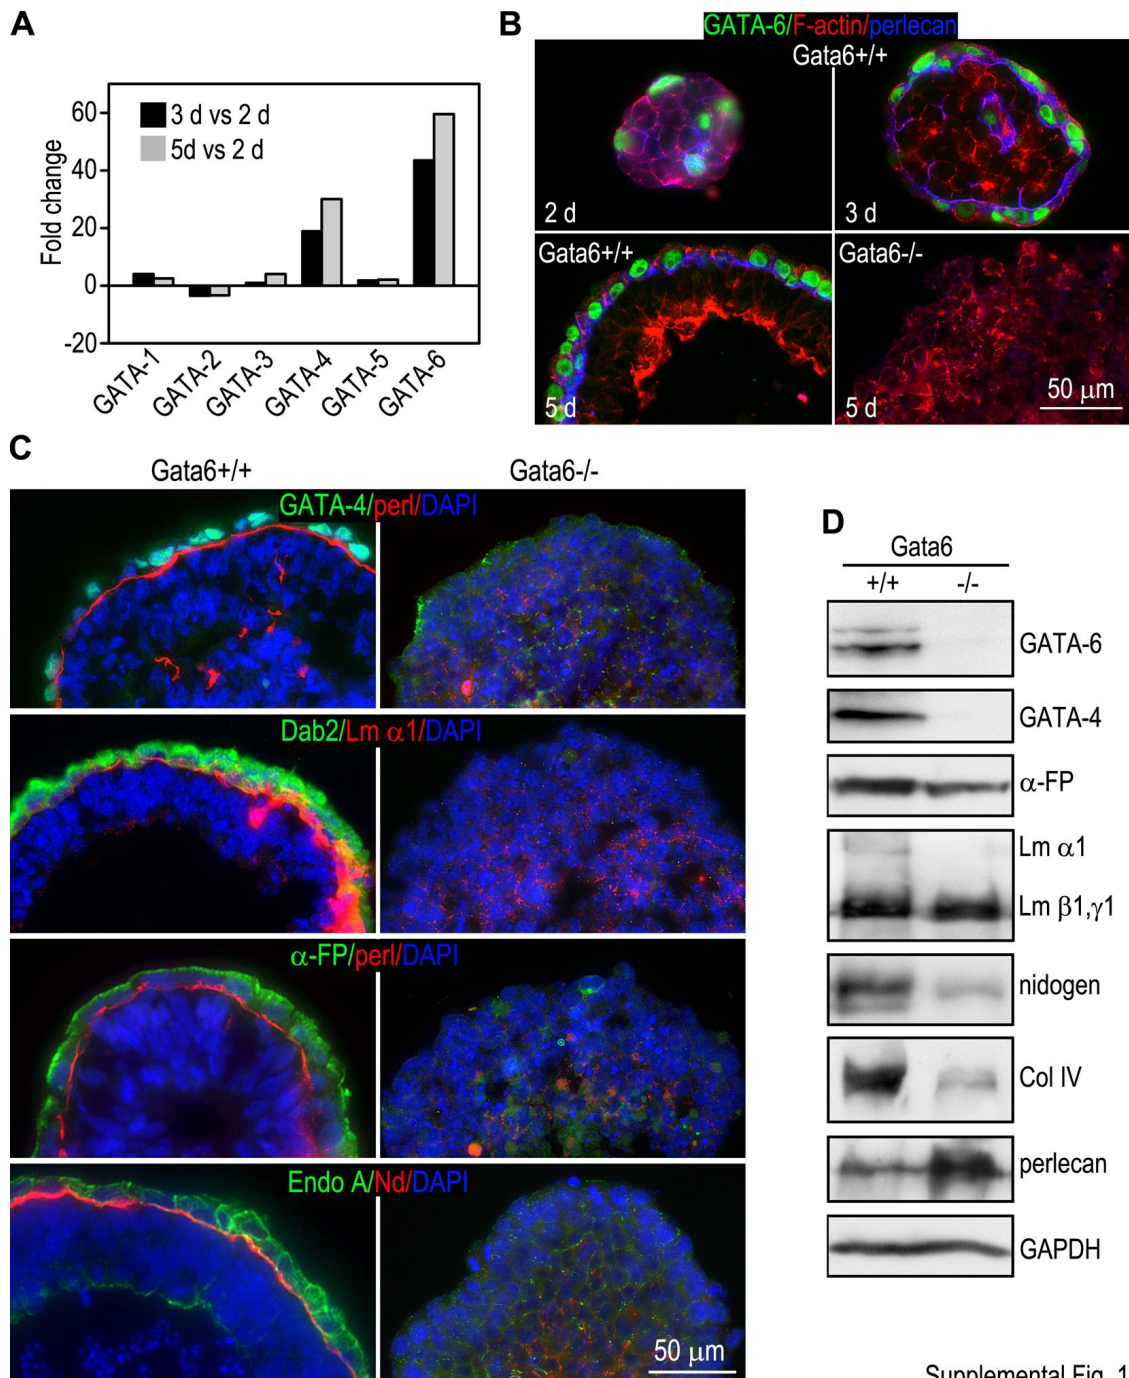

Supplemental Fig. 1

**Supplemental Figure 1.** Ablation of GATA-6 blocks endoderm differentiation and BM assembly. (A) Microarray analysis of mRNAs for GATA transcription factors revealed significant upregulation of GATA-4 and 6 during normal EB differentiation. The data shown are the average of two biological replicates. (B) Immunofluorescence microscopy showed that GATA-6 was expressed in the nucleus of normal endodermal cells. *Gata6*<sup>-/-</sup> EBs were used as negative controls. Rhodamine-phalloidin was used to stain F-actin to show the formation of an actin belt in 5-day normal EBs but not *Gata6*<sup>-/-</sup> EBs. (C) Immunostaining of 4-day EBs for the endoderm markers GATA-4, disabled-2 (*Dab2*),  $\alpha$ -

fetoprotein ( $\alpha$ -FP) and cytokeratin Endo A showed no endoderm formation in *Gata6*<sup>-/-</sup> EBs. BM was also absent from *Gata6*<sup>-/-</sup> EBs as evidenced by immunofluorescence of laminin  $\alpha$ 1 (Lm  $\alpha$ 1), perlecan (perl) or nidogen (Nd). (D) Immunoblots show that GATA-6 was not expressed in *Gata6*<sup>-/-</sup> EBs. The expression of the laminin  $\alpha$ 1 chain (Lm  $\alpha$ 1), nidogen, collagen IV (Col IV) and the endodermal markers GATA-4 and  $\alpha$ -fetoprotein ( $\alpha$ -FP) was reduced in *Gata6*<sup>-/-</sup> EBs.

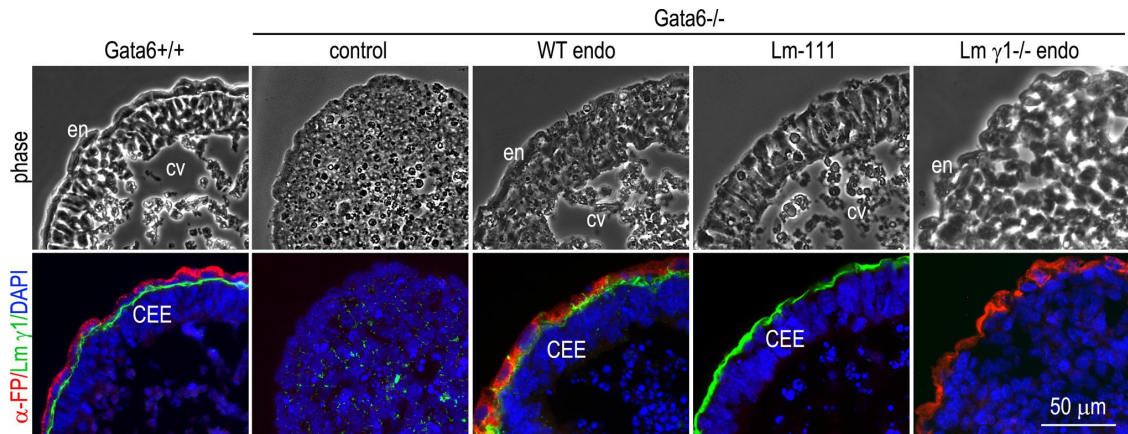

Supplemental Fig. 2

**Supplemental Figure 2.** Contributions of endoderm-derived factors to epiblast polarization and cavitation. GATA-6 <sup>-/-</sup> EBs were treated with 100 μg/ml laminin (Lm)-111 or grafted with wild-type (WT) or Lm γ1-null endoderm (endo) cells and cultured for 5 days. *Gata6*<sup>+/+</sup> and untreated <sup>-/-</sup> EBs were used as controls. EBs were immunostained for α-fetoprotein and Lm γ1. Nuclei were counterstained with DAPI. Grafting normal but not Lm γ1-null endoderm cells onto GATA-6-null EBs induced basement membrane assembly, the formation of a columnar epiblast epithelium (CEE) and cavitation. Treatment of the null EBs with Lm-111 had a similar effect.

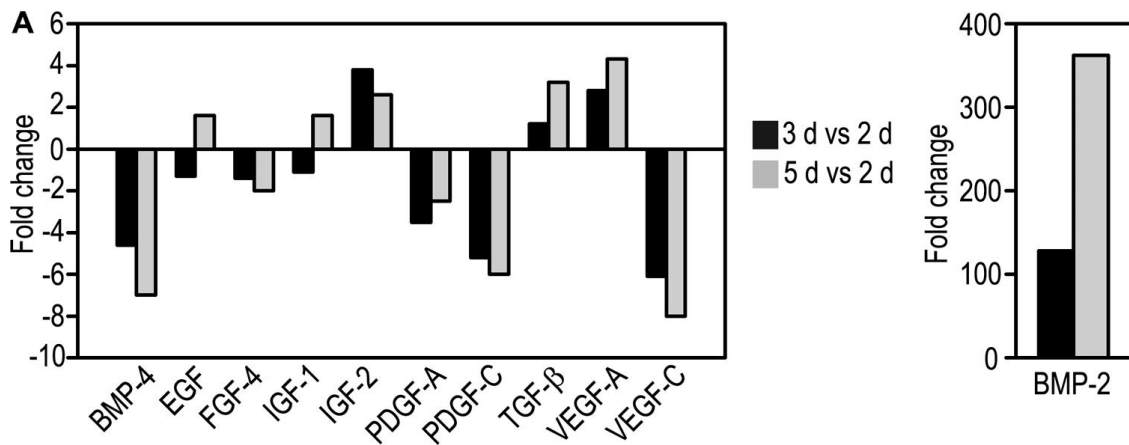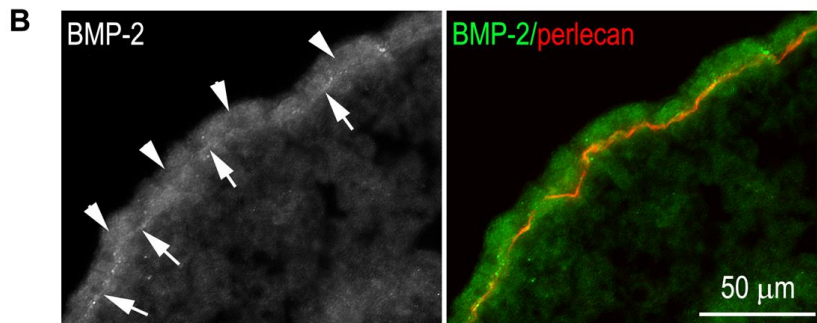

Suppl. Fig. 3

**Supplemental Figure 3.** BMP-2 is upregulated in endoderm and enriched in the basement membrane during EB differentiation. (A) Microarray analysis of mRNAs for growth factors showed significant upregulation of BMP-2 during normal EB differentiation. The data shown are the average of two detections. (B) Immunostaining of 4-day EBs showed that BMP-2 was mainly expressed in endoderm (arrowheads) of normal EBs and was enriched in the underlying BM (arrows).
